# Supplementary material
Source: PubMed Central journal article supplement (PMC10664205)
Supplement: NIHMS1942368-supplement-1.pdf [file NIHMS1942368-supplement-1.pdf]

## **ASSOCIATED CONTENT**

### **Supporting Information**

The supporting information is available free of charge at <https://pubs.acs.org/doi>

Primers, calculated and observed masses for all constructs, percentage of active enzyme, salt bridge interactions for hhYR-4OT and hhCF-4OT, and artificial symmetry model of YR
